# Supplementary material for: Elemental fractionation during condensation of plasma plumes generated by laser ablation: a ToF-SIMS study of condensate blankets
Source: Royal Society of Chemistry journal article supplement (doi:10.1039/c5ja00320b), 2015-01-01
Supplement: c5ja00320b1.pdf [file c5ja00320b1.pdf]

## Electronic Supplementary File

### 1. Depth profiles of elements imaged in this study

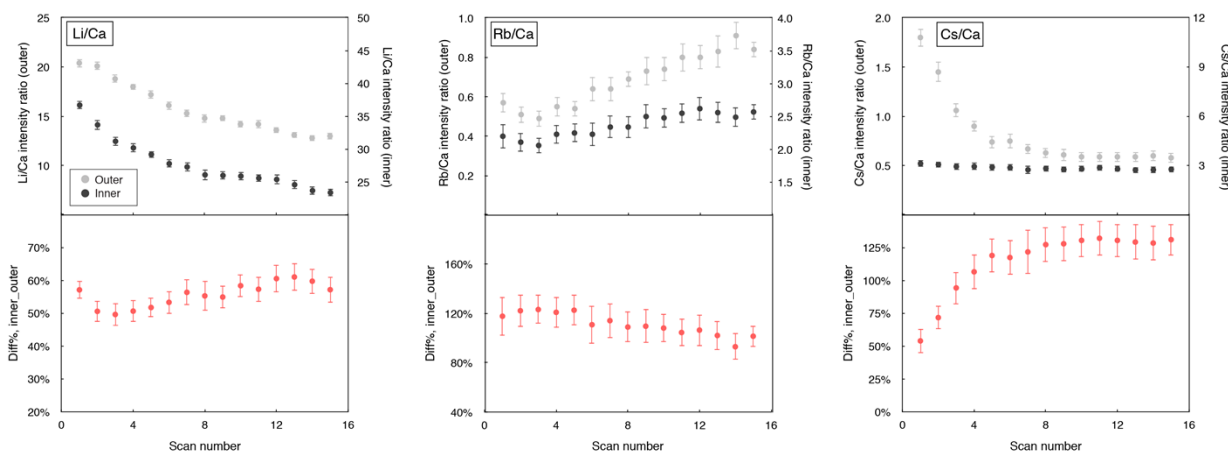

**Fig. S1** Alkaline metal composition depth profiles.

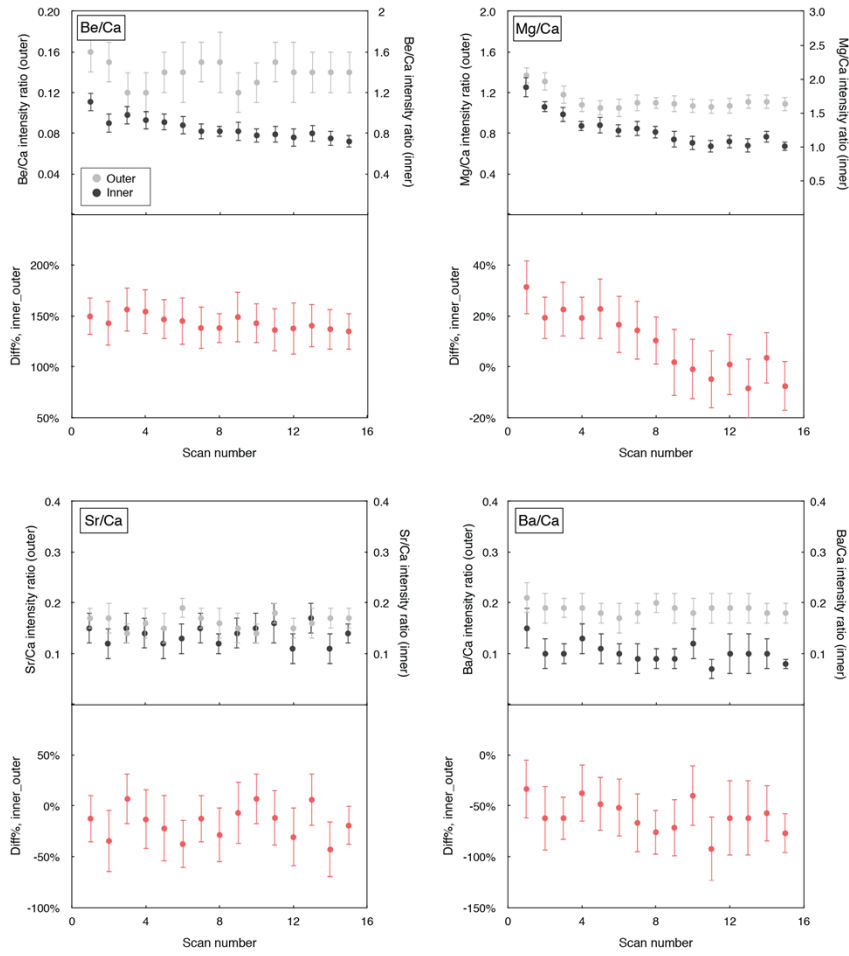

**Fig. S2** Alkaline earth metal composition depth profiles.

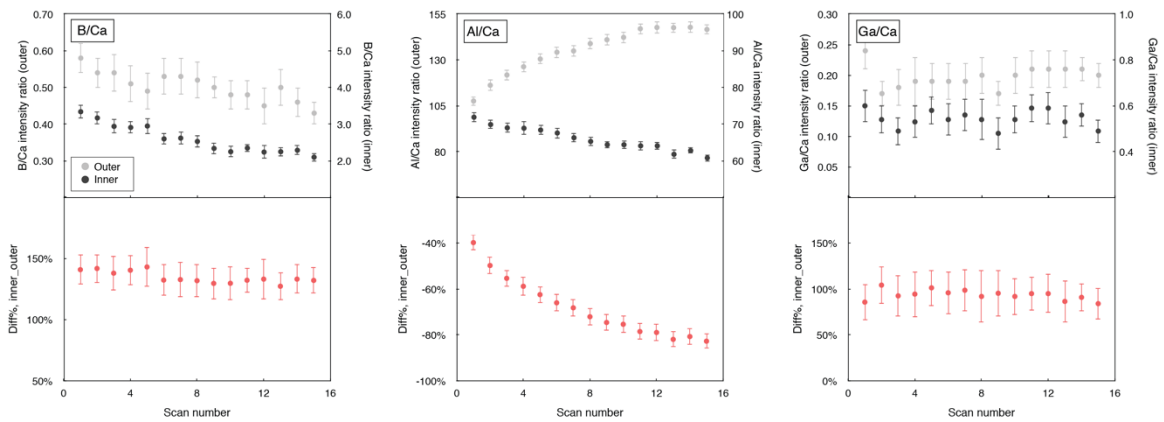

**Fig. S3** B-Al-Ga composition depth profiles.

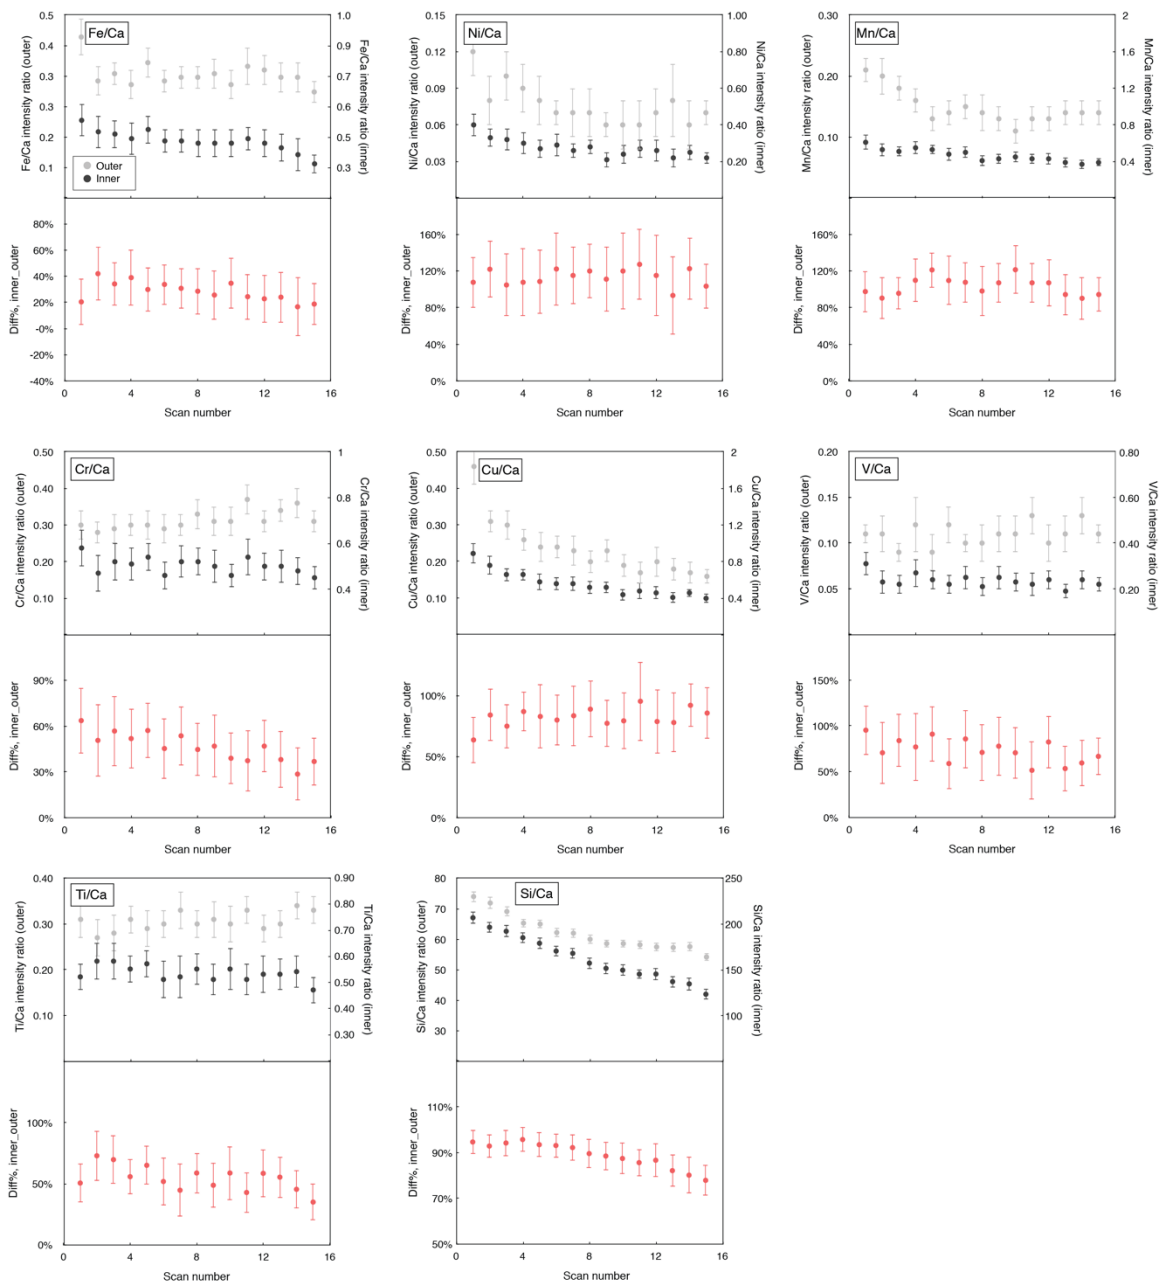

**Fig. S4** Transition metal and Si composition depth profiles.

## 2. First and last integrated scans of X/Ca in the condensate blanket

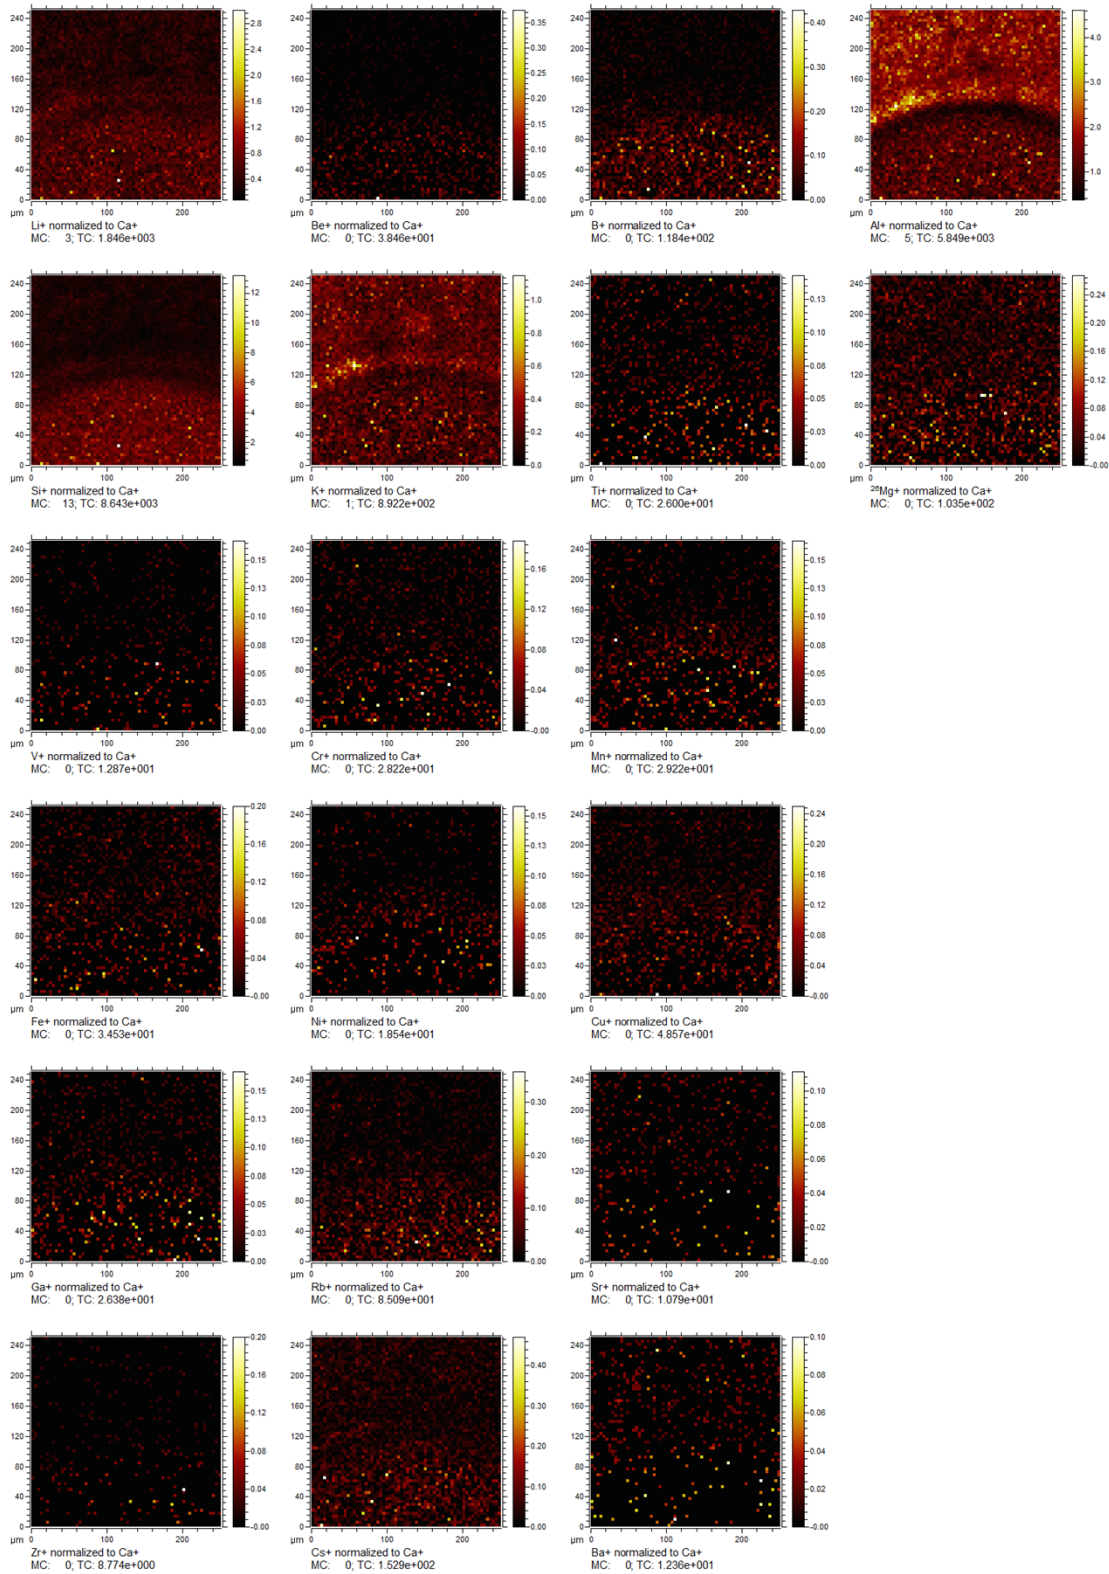

**Fig. S5** X/Ca distributions across the condensate blanket (first integrated scan).

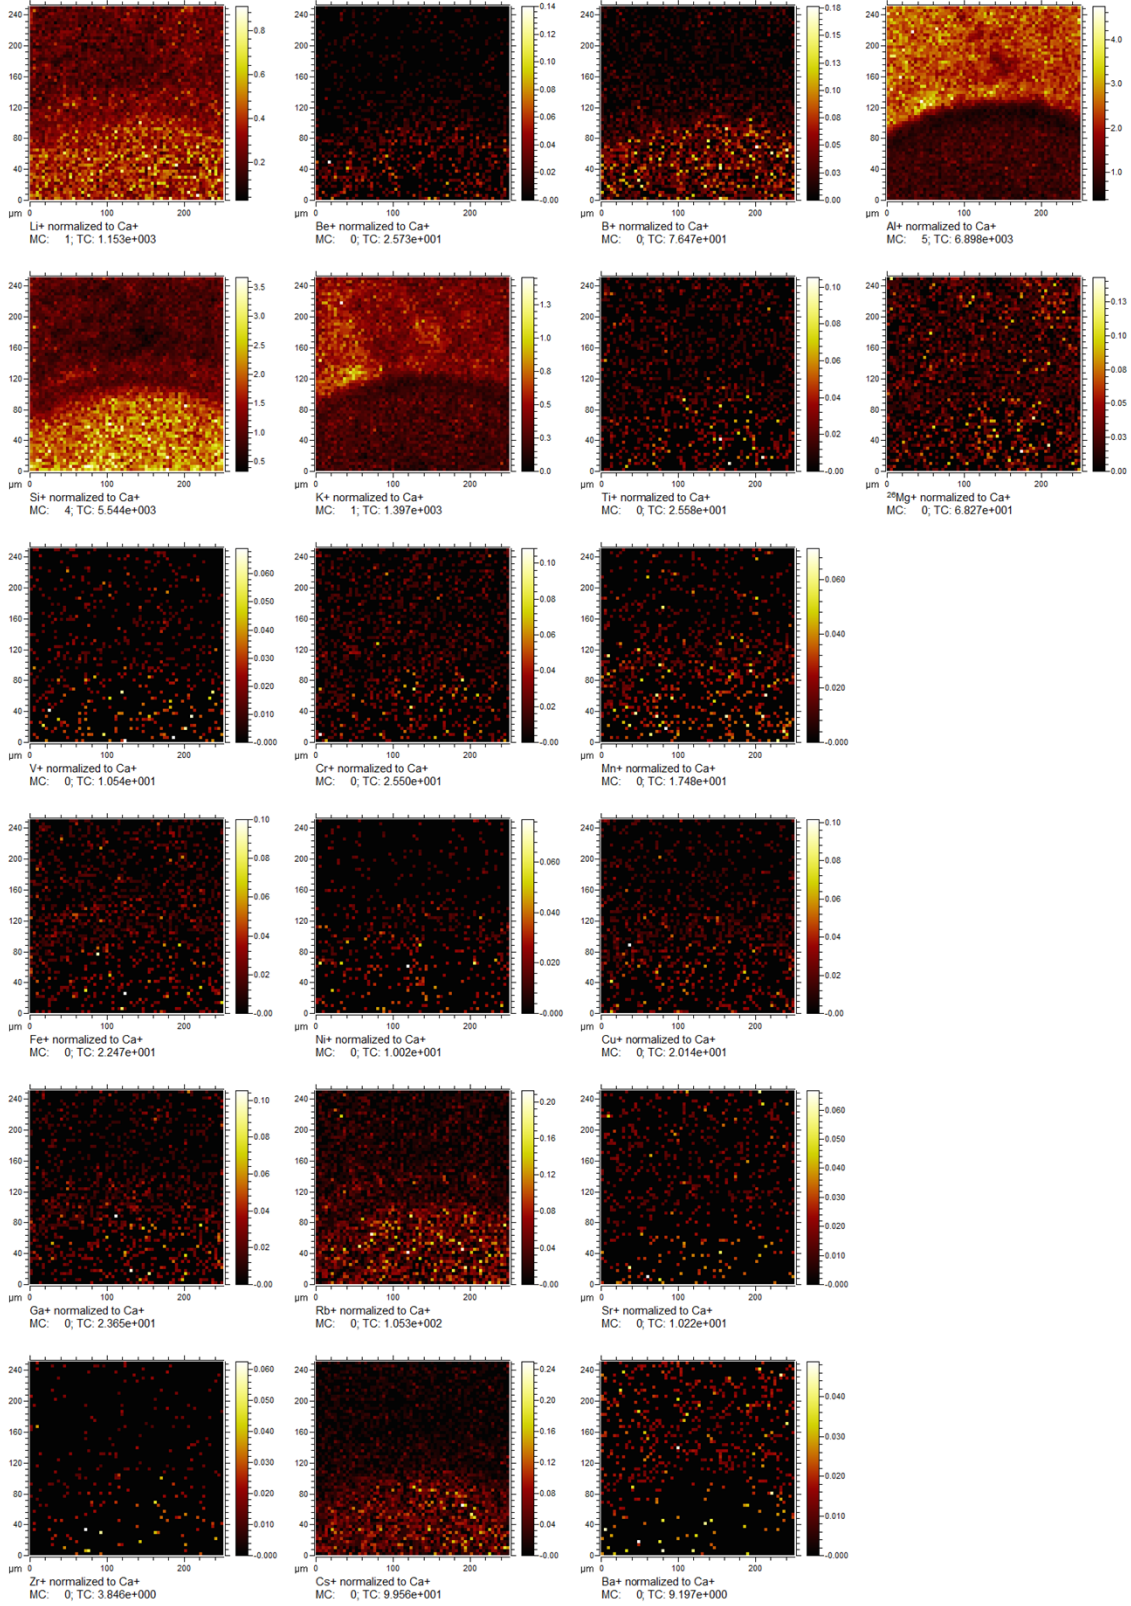

**Fig. S6** X/Ca distributions across the condensate blanket (fifteenth integrated scan).
